# Supplementary material for: Differential Modulation of Mouse Heart Gene Expression by Infection With Two Trypanosoma cruzi Strains: A Transcriptome Analysis
Source: Front Genet. 2020 Sep 3;11:1031. doi: 10.3389/fgene.2020.01031 (PMC7495023; doi:10.3389/fgene.2020.01031)
Supplement: TABLE S1 — RNA quality and library size. The sample concentration, volume, total mass, RIN score, 28S/18S ratio quality information as submitted for sequencing. [file Table_1.XLSX]

## Sheet: Header
S1 Table: RNA quality data and library size. The sample concentration, volume, total mass, RIN score, 28S/18S ratio quality information as submitted for sequencing.

## Sheet: RNA Quality and Library Size
Sample Name	Concentration (ng/μL)	Volume (μL)	Total Mass (μg)	RIN	28S/18S	Groups	Sub Total Sequences (Library Size) (Paired_End)
3	675	23	15.63	7.1	0.7	Control	12282839
4	478	28	13.38	6.9	1		12471492
5	376	28	10.53	7.3	1		12499734
6	588	27	15.88	7.3	1.1	Col1.7G2	12512968
8	612	27	16.52	7.1	0.8		12395128
9	562	28	15.74	7.7	1.1		12512255
11	456	28	12.77	7	1.4	JG	12512375
13	1137	28	31.84	8.6	1.4		12052513
14	912	28	25.54	8.1	1.4		12448530
16	548	27	14.8	8.2	1.5	Mixture	12469466
17	330	28	9.24	8	1.4		12382484
18	872	27	23.54	8.5	1.7		12448580
						Total	148988364

## Sheet: README
Column definitions:	Sample Name	Sample IDs that were chosen for downstream procedures.
	Concentration (ng/μL)	The concentration of total RNA submitted for sequencing.
	Volume (μL)	The volume of the sample submitted for sequencing.
	Total Mass (μg)	Total mass of RNA obtained from extraction.
	RIN	RIN score obtained when running the Bioanalyser.
	28S/18S	28S/18S ratio obtained by the Bioanalyser.
	Groups	The group of each sample.
	Sub Total Sequences (Library Size) (Paired_End)	Total number of sequence reads obtained from the sequencing machine.
